# Supplementary material for: Resting energy expenditure in children at risk of hypothalamic dysfunction
Source: PubMed Central journal article supplement — Endocr Connect. 2022 Jun 27;11(8):e220276. doi: 10.1530/EC-22-0276 (PMC9346331; doi:10.1530/ec-22-0276), 2022-06-27
Supplement: supplementary_table_1.pdf [file supplementary_table_1.pdf]

**Supplemental table 1.** Comparison of the mean resting energy expenditure calculated by different equations and clinical hypothalamic dysfunction symptoms

| <i>REE equations</i>   | CHD 0<br>( <i>n</i> = 11) | CHD mild<br>( <i>n</i> = 21) | CHD<br>moderate<br>( <i>n</i> = 23) | CHD severe<br>( <i>n</i> = 12) | <i>p</i> - value |
|------------------------|---------------------------|------------------------------|-------------------------------------|--------------------------------|------------------|
| Schofield wt & ht [33] | 0.89 ± 0.12               | 0.86 ± 0.19                  | 0.88 ± 0.15                         | 0.65 ± 0.17                    | 0.001            |
| H&B [34]               | 0.89 ± 0.09               | 0.88 ± 0.18                  | 0.92 ± 0.18                         | 0.68 ± 0.19                    | 0.002            |
| Henry (1999) [35]      | 0.89 ± 0.11               | 0.87 ± 0.18                  | 0.88 ± 0.16                         | 0.65 ± 0.18                    | 0.001            |
| Henry (2005) [36]      | 0.90 ± 0.12               | 0.87 ± 0.18                  | 0.89 ± 0.17                         | 0.66 ± 0.19                    | 0.001            |
| IOM hw [37]            | 0.88 ± 0.12               | 0.87 ± 0.19                  | 0.89 ± 0.16                         | 0.66 ± 0.20                    | 0.002            |
| IOM oo [37]            | 0.89 ± 0.10               | 0.86 ± 0.19                  | 0.87 ± 0.15                         | 0.65 ± 0.18                    | 0.001            |
| Lazzer et al. [38]     | 0.88 ± 0.13               | 0.86 ± 0.19                  | 0.85 ± 0.14                         | 0.64 ± 0.18                    | 0.001            |
| Mifflin et al. [39]    | 0.99 ± 0.17               | 0.96 ± 0.21                  | 0.99 ± 0.16                         | 0.75 ± 0.22                    | 0.002            |
| Molnar et al. [40]     | 0.94 ± 0.10               | 0.90 ± 0.20                  | 0.95 ± 0.18                         | 0.71 ± 0.20                    | 0.003            |
| Muller et al. [41]     | 0.88 ± 0.09               | 0.90 ± 0.18                  | 0.93 ± 0.15                         | 0.70 ± 0.19                    | 0.002            |
| Schmelze et al. [42]   | 0.85 ± 0.18               | 0.84 ± 0.20                  | 0.88 ± 0.16                         | 0.65 ± 0.19                    | 0.005            |
| WHO (1985) [43]        | 0.90 ± 0.12               | 0.88 ± 0.18                  | 0.91 ± 0.16                         | 0.68 ± 0.20                    | 0.002            |

Values are presented as mean ± SD.

REE: resting energy expenditure, H&B; Harris & Benedict, wt; weight, ht; height, IOM; Institute of Medicine, w; healthy weight, oo; overweight and obese, WHO; World Health Organization

Resting energy expenditure quotient: Measured resting energy expenditure divided by predicted resting energy expenditure

Clinical presence of hypothalamic dysfunction (CHD) was scored by data retrieved in the retrospective chart review. An adjusted clinical HD score of de Vile et al. was used, rating HD as: grade I (mild): presence of postoperative obesity (BMI > +2.0 SDS) or weight gain (>+1.5 BMI SDS) with no change in affect or behavior indicative of hypothalamic HD; grade II (moderate) obesity (BMI >+2.0 SDS) or weight gain (>+1.5 BMI SDS) in addition to presence of an obvious period of hyperphagia or an associated change in affective behavior or memory, and grade III; presence of obesity (>+3.0 BMI SDS) or extreme weight gain (>+2.0 BMI SDS) with (severe) hyperphagia and presence of other clinical manifestations, such as impaired thirst, rage behavior, or disturbances of thermoregulation, memory, and sleep—wake pattern.
