# Supplementary material for: Resting energy expenditure in children at risk of hypothalamic dysfunction
Source: PubMed Central journal article supplement — Endocr Connect. 2022 Jun 27;11(8):e220276. doi: 10.1530/EC-22-0276 (PMC9346331; doi:10.1530/ec-22-0276), 2022-06-27
Supplement: supplementary_table_2.pdf [file supplementary_table_2.pdf]

**Supplemental table 2.** Comparison of the mean resting energy expenditure quotients calculated by different equations and hypothalamic damage on MRI

| <i>REE equations</i>   | Muller grade 0 ( <i>n</i> = 10) | Muller grade I ( <i>n</i> = 18) | Muller grade II ( <i>n</i> = 34) | <i>p</i> -value |
|------------------------|---------------------------------|---------------------------------|----------------------------------|-----------------|
| Schofield wt & ht [33] | 0.89 ± 0.09                     | 0.90 ± 0.16                     | 0.77 ± 0.19                      | 0.017*          |
| H&B [34]               | 0.92 ± 0.07                     | 0.91 ± 0.17                     | 0.80 ± 0.20                      | 0.056           |
| Henry (1999) [35]      | 0.90 ± 0.08                     | 0.89 ± 0.16                     | 0.77 ± 0.19                      | 0.025*          |
| Henry (2005) [36]      | 0.90 ± 0.09                     | 0.90 ± 0.17                     | 0.76 ± 0.20                      | 0.015*          |
| IOM hw [37]            | 0.88 ± 0.10                     | 0.91 ± 0.16                     | 0.77 ± 0.20                      | 0.018*          |
| IOM oo [37]            | 0.91 ± 0.07                     | 0.89 ± 0.15                     | 0.77 ± 0.20                      | 0.019*          |
| Lazzer et al. [38]     | 0.90 ± 0.08                     | 0.87 ± 0.16                     | 0.76 ± 0.20                      | 0.028*          |
| Mifflin et al. [39]    | 0.97 ± 0.09                     | 0.99 ± 0.21                     | 0.89 ± 0.22                      | 0.167           |
| Molnar et al. [40]     | 0.96 ± 0.07                     | 0.93 ± 0.16                     | 0.82 ± 0.22                      | 0.039*          |
| Muller et al. [41]     | 0.93 ± 0.10                     | 0.91 ± 0.16                     | 0.81 ± 0.19                      | 0.063           |
| Schmelze et al. [42]   | 0.87 ± 0.13                     | 0.89 ± 0.19                     | 0.76 ± 0.21                      | 0.051           |
| WHO (1985) [43]        | 0.90 ± 0.09                     | 0.92 ± 0.17                     | 0.79 ± 0.19                      | 0.030*          |

Values are presented as mean ± SD.

REE: resting energy expenditure, H&B; Harris & Benedict, wt; weight, ht; height, IOM; Institute of Medicine, w; healthy weight, oo; overweight and obese, WHO; World Health Organization

Resting energy expenditure quotient: Measured resting energy expenditure divided by predicted resting energy expenditure

Hypothalamic damage was scored only in children with brain tumor diagnosis (*n* = 62), using an adjusted Muller grading consisting of: grade 0: no hypothalamic involvement/lesion, grade I: hypothalamic involvement/lesion of the anterior hypothalamus not involving the hypothalamic area beyond mammillary bodies, grade II: hypothalamic involvement/lesion of the anterior and/or solely posterior hypothalamic area, i.e. involving the area beyond the mammillary bodies.
